# Supplementary material for: Detection of Cannabinoid Receptor Expression by Endometriotic Lesions in Women with Endometriosis as an Alternative to Opioid-Based Pain Medication
Source: Hindawi journal article supplement (doi:10.1155/2022/4323259), 2022-06-02
Supplement: f1 [file 4323259.f1.pdf]

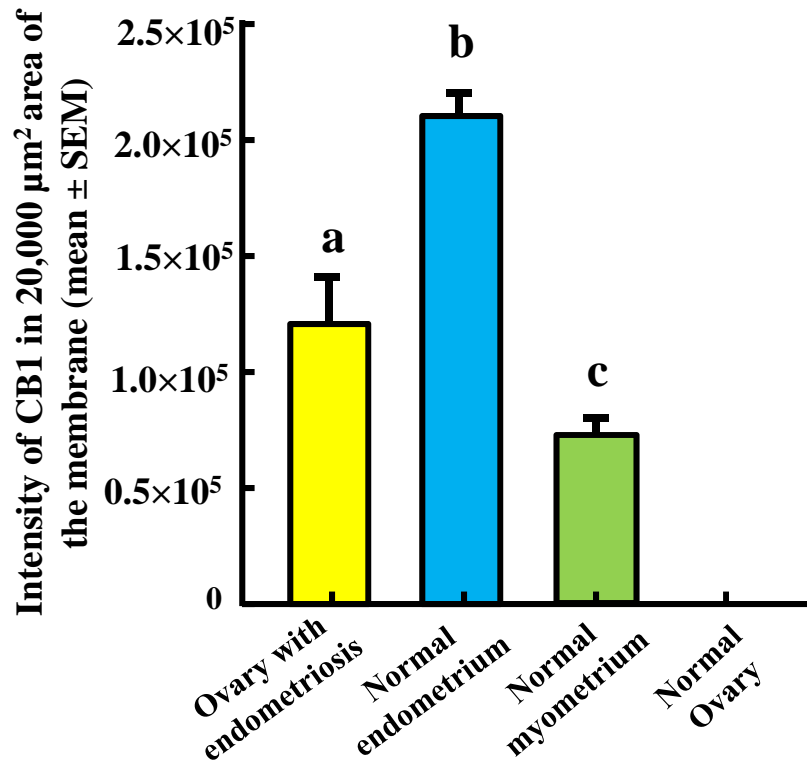

**Supplementary figure 1.**

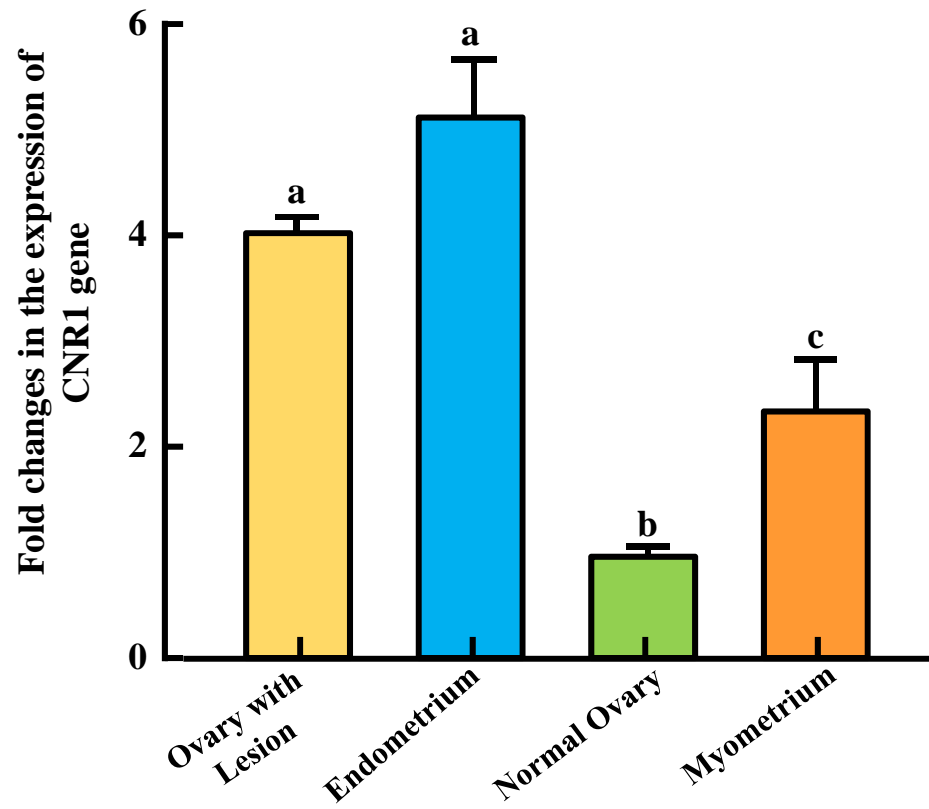

**Supplementary figure 2**

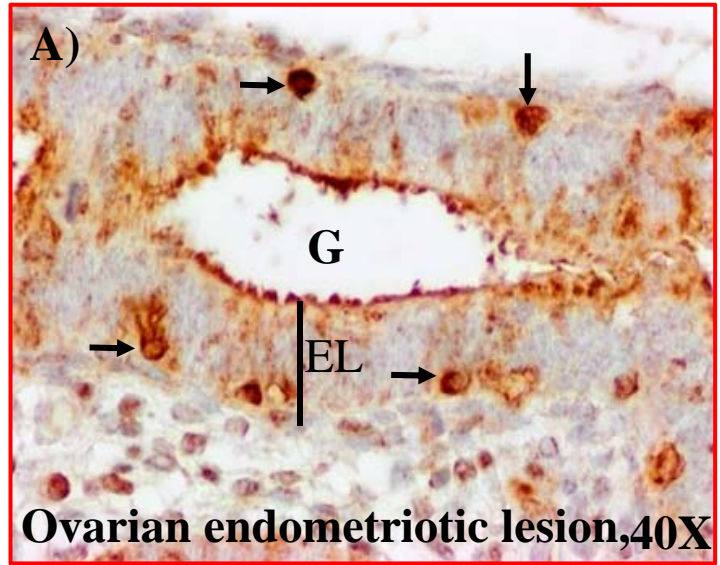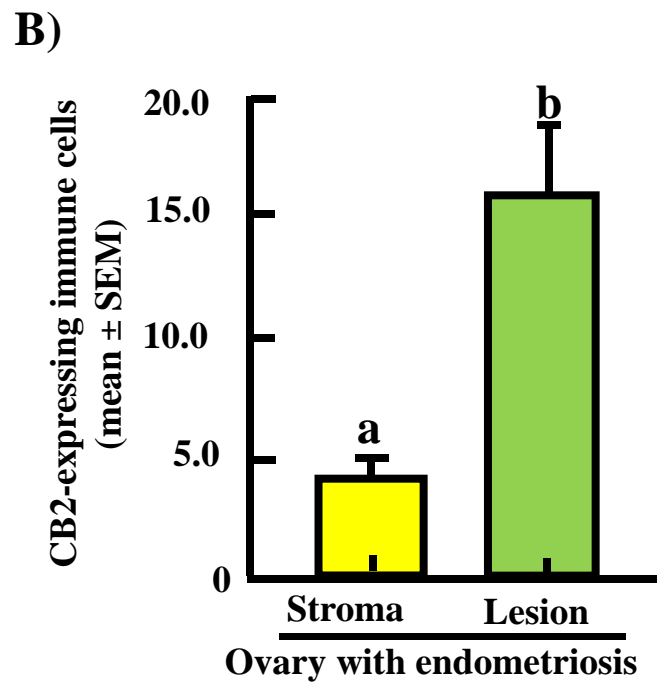

**Supplementary figure 3**

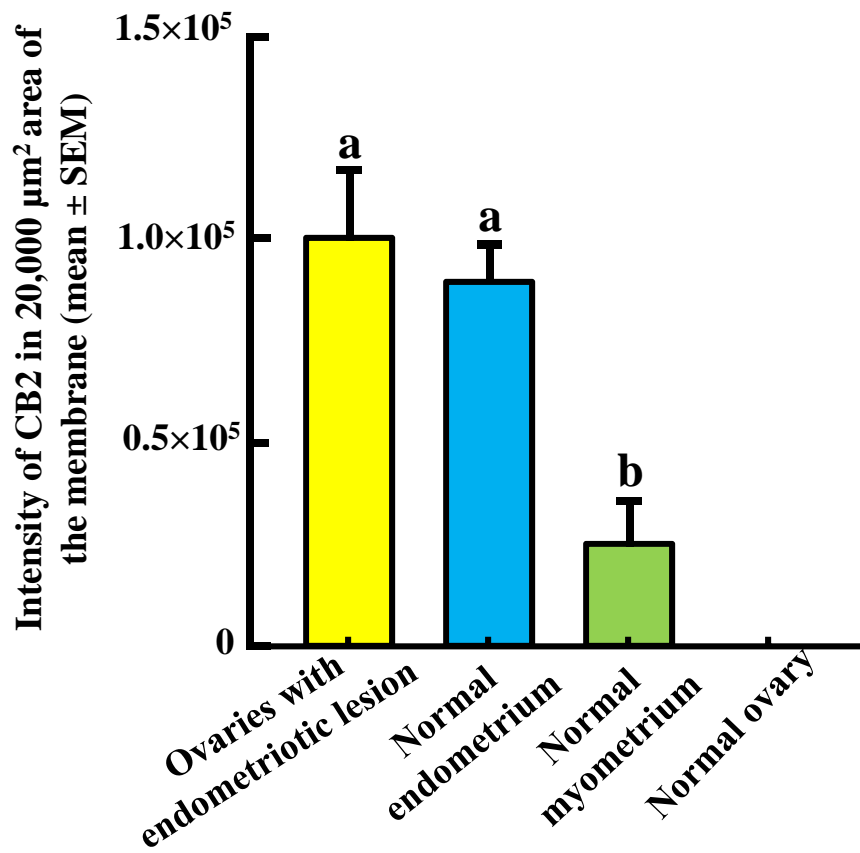

Supplementary figure 4

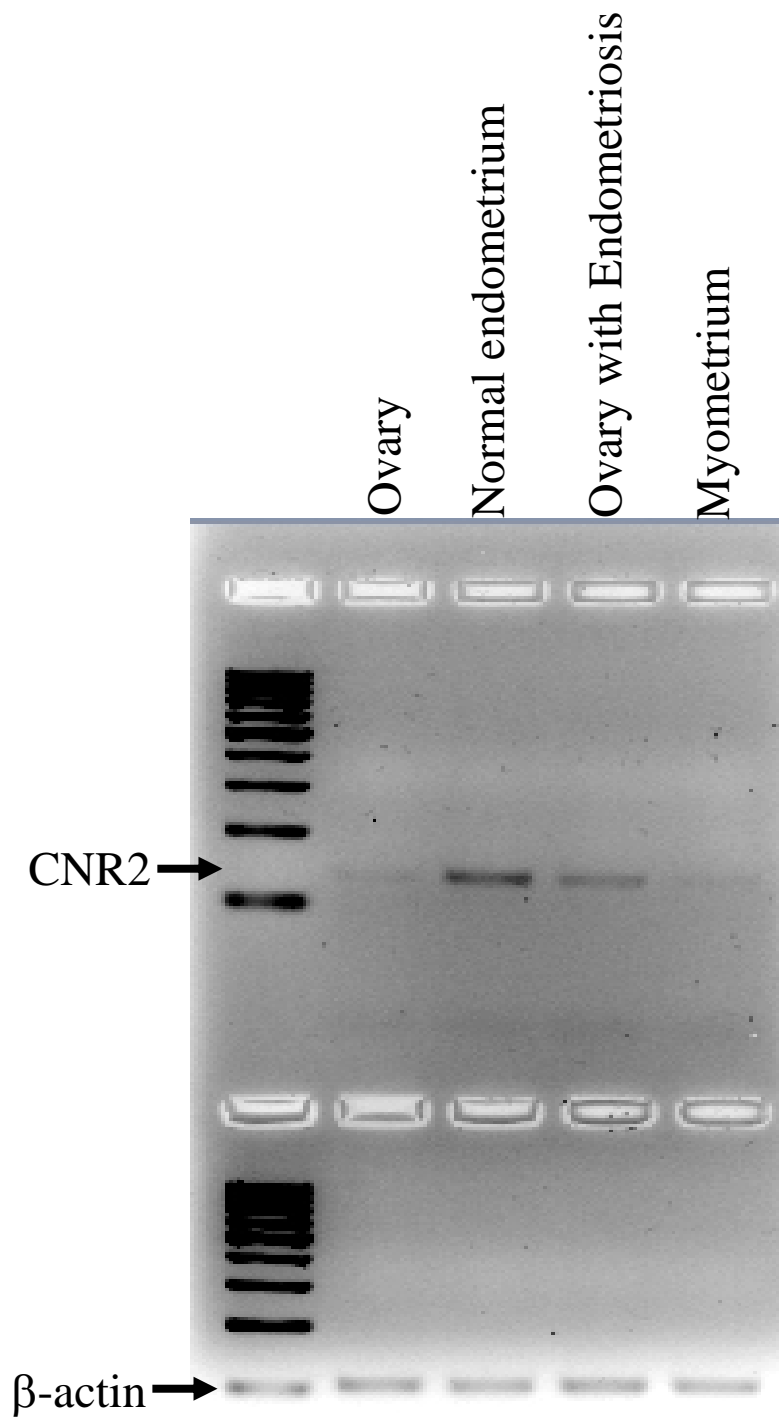

**Supplementary figure 5**
